# Supplementary material
Source: MDPI journal article supplement (https://www.mdpi.com/2073-4395/12/2/512)
Supplement: s1 [file s1]

Archive with 3 entries (3 files):
- Figure S1 and Figure S2.pdf
- Table S1.pdf
- Table S2.pdf
